# Supplementary material
Source: publisher site journal article supplement (https://www.dovepress.com/article/464916)
Supplement: Supplementary file 1 [file get_supplementary_file.php]

**Supplementary material**

**
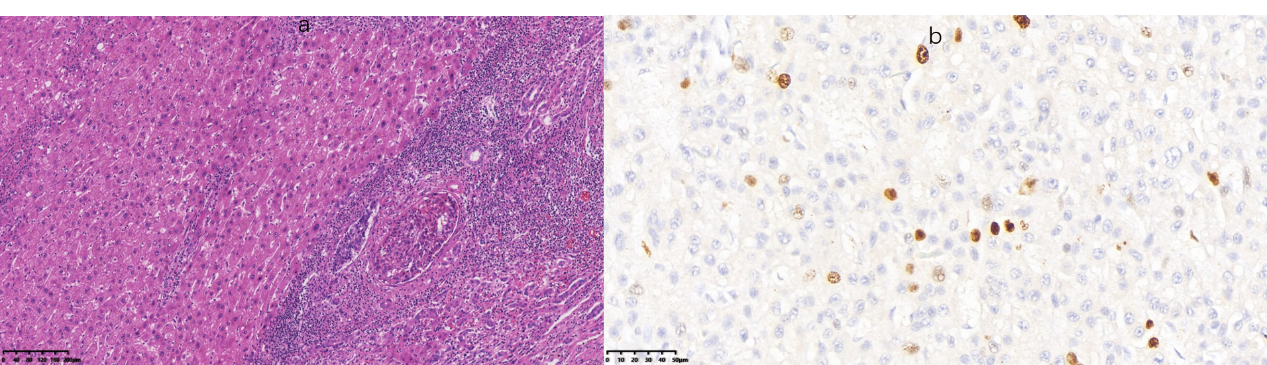
**

**Supplementary Figure 1. Immunohistochemical staining: a-MVI (+); b- Ki-67(8).**

**Supplementary Table 1. The results of different MRI sequences for variance threshold, SelectKBest, and LASSO.**

| **Models** | **The number of selected features** | | |
| --- | --- | --- | --- |
| **The variance threshold method** | **The select K best methods** | **The LASSO algorithm** |
| **T2** | 600 | 29 | 11 |
| **AP** | 577 | 107 | 12 |
| **PVP** | 575 | 63 | 17 |
| **DP** | 568 | 54 | 12 |
| **T2+AP+PVP+DP** | 2299 | 882 | 18 |

**Supplementary Table 2. Radiomic features, class，filter and correlation coefficients in model(T2).**

| **Radiomic feature** | **Radiomic class** | **Filter** | **Coefficients** |
| --- | --- | --- | --- |
| HighGrayLevelZoneEmphasis | glszm | wavelet-LLL | 0.031173179 |
| original | 0.031352874 |
| logarithm | 1.35946E-17 |
| squareroot | 9.06305E-18 |
| wavelet-HLH | 0.071721978 |
| ShortRunHighGrayLevelEmphasis | glrlm | wavelet-LLH | 0.032087675 |
| wavelet-LLL | 0.0063864 |
| Kurtosis | firstorder | squareroot | 0.068988713 |
| ZoneEntropy | glszm | wavelet-HLH | 0.038546803 |
| SmallAreaHighGrayLevelEmphasis | glszm | wavelet-LHH | 0.021263589 |
| SizeZoneNonUniformity | glszm | lbp-3D-k | 0.036722759 |

**Supplementary Table 3. Radiomic features, class，filter and correlation coefficients in model(AP).**

| **Radiomic feature** | **Radiomic class** | **Filter** | **Coefficients** |
| --- | --- | --- | --- |
| LongRunLowGrayLevelEmphasis | glrlm | wavelet-HLH | 0.015846409 |
| wavelet-LHH | 0.018599303 |
| original | 0.016095094 |
| logarithm | 4.07837E-17 |
| squareroot | 4.53152E-18 |
| RunLengthNonUniformity | glrlm | original | 0.025253155 |
| logarithm | 4.53152E-18 |
| squareroot | 3.17207E-17 |
| 10Percentile | firstorder | wavelet-LLH | 0.018095714 |
| Autocorrelation | glcm | wavelet-LLH | 0.124220583 |
| LargeDependenceEmphasis | gldm | wavelet-LLH | -0.050596573 |
| ZoneEntropy | glszm | wavelet-HHH | 0.028688942 |

**Supplementary Table 4. Radiomic features, class，filter and correlation coefficients in model(PVP).**

| **Radiomic feature** | **Radiomic class** | **Filter** | **Coefficients** |
| --- | --- | --- | --- |
| ZoneEntropy | glszm | wavelet-HLL | 0.036421886 |
| wavelet-LHH | 0.021080913 |
| LargeAreaLowGrayLevelEmphasis | glszm | original | 0.042422696 |
| logarithm | 1.13288E-17 |
| squareroot | 2.26576E-18 |
| RunLengthNonUniformity | glrlm | exponential | 0.015084741 |
| square | 2.26576E-18 |
| lbp-2D | 2.26576E-18 |
| lbp-3D-m1 | 2.26576E-18 |
| lbp-3D-m2 | 2.26576E-18 |
| HighGrayLevelRunEmphasis | glrlm | wavelet-LLH | 0.057091047 |
| LongRunHighGrayLevelEmphasis | glrlm | wavelet-LLH | 0.025997051 |
| LongRunEmphasis | glrlm | wavelet-LHL | 0.0101361 |
| Maximum | firstorder | wavelet-LLH | 0.045545835 |
| GrayLevelNonUniformity | glszm | wavelet-HHL | 0.009695529 |
| LargeDependenceLowGrayLevelEmphasis | gldm | wavelet-LLH | -0.029481239 |
| HighGrayLevelZoneEmphasis | glszm | wavelet-LLH | -0.050524306 |

**Supplementary Table 5. Radiomic features, class，filter and correlation coefficients in model(DP).**

| **Radiomic feature** | **Radiomic class** | **Filter** | **Coefficients** |
| --- | --- | --- | --- |
| ZoneVariance | glszm | exponential | 0.060358999 |
| gradient | 1.1782E-16 |
| square | 4.53152E-17 |
| lbp-2D | 3.62522E-17 |
| lbp-3D-m2 | 4.53152E-18 |
| Maximum | firstorder | wavelet-LLH | 0.037452582 |
| Autocorrelation | glcm | wavelet-LLH | 0.011002524 |
| HighGrayLevelRunEmphasis | glrlm | wavelet-LLH | 0.046208764 |
| LongRunHighGrayLevelEmphasis | glrlm | wavelet-LLH | 0.003729413 |
| ZoneEntropy | glszm | wavelet-HHH | 0.074032329 |
| SmallAreaHighGrayLevelEmphasis | glszm | wavelet-LHL | 0.011101117 |
| LargeAreaLowGrayLevelEmphasis | glszm | original | 0.019668193 |

**Supplementary Table 6. Radiomic features, class，filter, MRI sequence and correlation coefficients in model(T2+AP+PVP+DP).**

| **Radiomic feature** | **Radiomic class** | **Sequence；Filter** | **Coefficients** |
| --- | --- | --- | --- |
| ZoneEntropy | glszm | HCC-AP; wavelet-LHL | 0.032950523 |
| HCC-DP; wavelet-HHH | 0.062642941 |
| HCC-AP; wavelet-HHH | 0.008710372 |
| HCC-T2; wavelet-HLH | 0.006697417 |
| Autocorrelation | glcm | HCC-DP; wavelet-LLH | 0.003546566 |
| HCC-PVP; wavelet-LLH | 0.006397402 |
| HCC-AP; wavelet-LLH | 0.014646531 |
| HighGrayLevelZoneEmphasis | glszm | HCC-T2; wavelet-LHH | 0.056646715 |
| HCC-T2; original | 0.017011781 |
| Maximum | firstorder | HCC-DP; wavelet-LLH | 0.035283121 |
| HCC-AP; gradient | 0.002309943 |
| LargeDependenceLowGrayLevelEmphasis | gldm | HCC-AP; wavelet-LLH | -0.052014753 |
| LongRunLowGrayLevelEmphasis | glrlm | HCC-PVP; wavelet-LHH | 0.013567957 |
| LongRunHighGrayLevelEmphasis | glrlm | HCC-PVP; wavelet-LLH | 0.040484385 |
| LargeAreaEmphasis | glszm | HCC-T2; exponential | 0.04914539 |
| 10Percentile | firstorder | HCC-AP; wavelet-LLH | 0.020459991 |
| Mean | firstorder | HCC-PVP; bp-3D-m2 | -0.054787715 |
| Busyness | ngtdm | HCC-DP; wavelet-LLL | 0.020109115 |

**Supplementary Table 7. Radiomic features, class，filter, MRI sequence and correlation coefficients in model(T2+AP+PVP+DP+AFP+Ki-67).**

| **Radiomic feature** | **Radiomic class** | **Sequence；Filter** | **Coefficients** |
| --- | --- | --- | --- |
| ZoneEntropy | glszm | HCC-AP; wavelet-LHL | 0.032950523 |
| HCC-DP; wavelet-HHH | 0.062642941 |
| HCC-AP; wavelet-HHH | 0.008710372 |
| HCC-T2; wavelet-HLH | 0.006697417 |
| Autocorrelation | glcm | HCC-DP; wavelet-LLH | 0.003546566 |
| HCC-PVP; wavelet-LLH | 0.006397402 |
| HCC-AP; wavelet-LLH | 0.014646531 |
| Maximum | firstorder | HCC-DP; wavelet-LLH | 0.035283121 |
| HCC-AP; gradient | 0.002309943 |
| HighGrayLevelZoneEmphasis | glszm | HCC-T2; wavelet-LHH | 0.056646715 |
| HCC-T2; original | 0.017011781 |
| LargeDependenceLowGrayLevelEmphasis | gldm | HCC-AP; wavelet-LLH | -0.052014753 |
| LongRunLowGrayLevelEmphasis | glrlm | HCC-PVP; wavelet-LHH | 0.013567957 |
| LongRunHighGrayLevelEmphasis | glrlm | HCC-PVP; wavelet-LLH | 0.040484385 |
| LargeAreaEmphasis | glszm | HCC-T2; exponential | 0.04914539 |
| 10Percentile | firstorder | HCC-AP; wavelet-LLH | 0.020459991 |
| Mean | firstorder | HCC-PVP; lbp-3D-m2 | -0.054787715 |
| Busyness | ngtdm | HCC-DP; wavelet-LLL | 0.020109115 |
